# Supplementary material for: Greater trophic diversity of soil animal communities under land use and warmer climate
Source: Research Square preprint supplement (doi:10.21203/rs.3.rs-5227558/v1), 2024-10-31
Supplement: Supplementary file 1 [file 368587656a5f84a551436a44.xlsx]

## Sheet: Sheet1
Table S1
log(SEAc_FG) ~ Functional_group*Climate*LandUse+(1|siteID)
	NumDF	DenDF	F	P-value	Pr(>F)
Functional_group	4	355.82	24.0476	<0.001	***
LandUse	1	137.33	16.7573	<0.001	***
Climate	1	153.41	40.9947	<0.001	***
Functional_group:LandUse	4	334.5	2.5319	0.040312	*
Functional_group:Climate	4	344.15	3.9101	0.004047	**
LandUse:Climate	1	151.75	0.7574	0.385528
Functional_group:LandUse:Climate	4	342.2	2.3291	0.055863	.
Table S2
log(SEAc_taxa) ~Functional_group*Climate*LandUse+(1|siteID)
	NumDF	DenDF	F	P-value	Pr(>F)
Functional_group	4	442.65	46.2777	<0.001	***
LandUse	1	163.41	13.2655	<0.001	***
Climate	1	163.26	14.3946	<0.001	***
Functional_group:LandUse	4	418.01	1.3215	0.261149
Functional_group:Climate	4	441.52	1.2438	0.291567
LandUse:Climate	1	239.24	0.0907	0.763602
Functional_group:LandUse:Climate	1	439.79	4.3829	0.0368725	*
Table S3
log(Mean_paired_distance) ~ Functional_group*LandUse*Climate+(1|siteID)
	NumDF	DenDF	F	P-value	Pr(>F)
Functional_group	4	1511.12	11.4406	<0.001	***
LandUse	1	51.04	6.8364	0.0117128	*
Climate	1	76.01	16.4005	<0.001	***
Functional_group:LandUse	4	1495.44	1.9891	0.0937772	.
Functional_group:Climate	4	1508.03	2.0584	0.0839561	.
LandUse:Climate	1	126.32	1.3356	0.249998
Functional_group:LandUse:Climate	4	1497.19	2.158	0.0715337	.
Table S4
log(sd_d13C) ~ Functional_group*LandUse*Climate+(1|siteID)
	NumDF	DenDF	F	P-value	Pr(>F)
Functional_group	4	428.46	21.314	<0.001	***
LandUse	3	237.13	7.1167	<0.001	***
Climate	3	232.71	4.1049	0.0072965	**
Functional_group:LandUse	10	428.33	2.5564	0.0052327	**
Functional_group:Climate	11	435.17	2.6043	0.0032048	**
LandUse:Climate	1	169.8	0.1054	0.745852
Functional_group:LandUse:Climate	4	405.94	5.1915	<0.001	***
log(sd_d15N) ~ Functional_group*LandUse*Climate+(1|siteID)
	NumDF	DenDF	F	P-value	Pr(>F)
Functional_group	4	395.84	20.3302	<0.001	***
LandUse	3	223.42	2.3733	0.07112	.
Climate	3	220.35	12.3603	<0.001	***
Functional_group:LandUse	10	397.32	0.4625	0.91362
Functional_group:Climate	11	397.73	1.4573	0.14519
LandUse:Climate	1	165.61	0.2058	0.65068
Functional_group:LandUse:Climate	4	363.93	0.8804	0.4757
Table S5
log(SEAc_FG) ~ MPD*Functional_group+(1|siteID)
	NumDF	DenDF	F	P-value
MPD	1	346.39	42.816	<0.001	***
Functional_group	4	335.9	29.502	<0.001	***
MPD:Functional_group	4	335.2	19.862	<0.001	***
log(SEAc_FG) ~ SEAc_taxa*Functional_group+(1|siteID)
	NumDF	DenDF	F	P-value
SEAc_taxa	1	569.19	655.908	<0.001	***
Functional_group	4	540.95	38.612	<0.001	***
SEAc_taxa:Functional_group	4	555.87	27.442	<0.001	***
log(SEAc_FG) ~ Functional_group*(sd_d13C+sd_d15N)+(1|siteID)
	NumDF	DenDF	F	P-value
Functional_group	4	405.91	3.5996	0.006732	**
sd_d13C	1	398.97	155.625	<0.001	***
sd_d15N	1	401.19	196.433	<0.001	***
Functional_group:sd_d13C	4	409.44	0.8327	0.504934
Functional_group:sd_d15N	4	412.65	0.8357	0.503017
Table S6
Contrast	group	estimate	SE	df	lower.CL	upper.CL	t.ratio	p.value	CI	signif
Tro_Tem	Overall	0.4655	0.1156	186.305	0.2375	0.6936	4.0272	<0.001	0.4561	***
Tro_Tem	Herbivores	0.4941	0.3174	414.154	-0.1298	1.118	1.5568	0.1203	1.2478
Tro_Tem	Detritivores	0.6056	0.1776	438.676	0.2565	0.9547	3.4092	<0.001	0.6982	***
Tro_Tem	Microbivores	0.4312	0.1666	433.781	0.1038	0.7586	2.5883	0.01	0.6548	**
Tro_Tem	Predators	0.6254	0.1702	432.452	0.2908	0.9599	3.6738	<0.001	0.6691	***
Tro_Tem	Mixed_feeder	0.1714	0.2412	435.952	-0.3027	0.6455	0.7106	0.4777	0.9482
Agr_Woo	Overall	0.3583	0.1156	186.305	0.1302	0.5863	3.0994	0.0022	0.4561	**
Agr_Woo	Herbivores	-0.1818	0.3174	414.154	-0.8057	0.4421	-0.5727	0.5671	1.2478
Agr_Woo	Detritivores	0.3727	0.1776	438.676	0.0236	0.7219	2.0983	0.0364	0.6983	*
Agr_Woo	Microbivores	0.5759	0.1666	433.781	0.2485	0.9033	3.4569	<0.001	0.6548	***
Agr_Woo	Predators	0.6943	0.1702	432.452	0.3598	1.0289	4.079	<0.001	0.6691	***
Agr_Woo	Mixed_feeder	0.3302	0.2412	435.952	-0.1439	0.8044	1.369	0.1717	0.9483
Table S7
	NumDF	DenDF	F	P-value
Functional_group	4	342.49	3.9115	0.0040395	**
Climate	1	249.27	9.1936	0.002685	**
LandUse	1	202.87	11.7283	0.0007448	***
Sampling size	1	335.92	0.8086	0.369167
Family richness	1	387.28	32.6135	2.242e-08	***
Functional_group:Climate	4	346.35	4.9756	0.0006537	***
Functional_group:LandUse	4	326.82	4.6456	0.0011649	**
Table S8
log(SEAc_Family) ~ Functional_group*Climate*LandUse+(1|siteID)
	NumDF	DenDF	F	value	Pr(>F)
Functional_group	4	515.59	3.0523	0.016692	*
Climate	1	528.22	15.8384	<0.001	***
LandUse	1	461.57	10.7126	0.001144	**
Functional_group:Climate	4	522.92	1.0314	0.390344
Functional_group:LandUse	4	482.33	0.6016	0.661687
log(SEAc_Genus) ~ Functional_group*Climate*LandUse+(1|siteID)
	NumDF	DenDF	F	value	Pr(>F)
Functional_group	4	430.87	0.8758	0.47832
Climate	1	414.91	6.9374	0.008757	**
LandUse	1	413.92	4.0779	0.044091	*
Functional_group:Climate	3	454.22	0.2085	0.890496
Functional_group:LandUse	4	436.4	3.8599	0.00429	**
log(SEAc_species) ~ Functional_group*Climate*LandUse+(1|siteID)
	NumDF	DenDF	F	value	Pr(>F)
Functional_group	4	336.73	0.5075	0.730289
Climate	1	88.63	8.0347	0.005683	**
LandUse	1	156.74	11.5642	<0.001	***
Functional_group:Climate	2	353.08	1.8373	0.160767
Functional_group:LandUse	3	342.74	0.995	0.395293
