# Supplementary figures and images for: Greater trophic diversity of soil animal communities under land use and warmer climate
Source: Research Square preprint supplement (doi:10.21203/rs.3.rs-5227558/v1), 2024-10-31

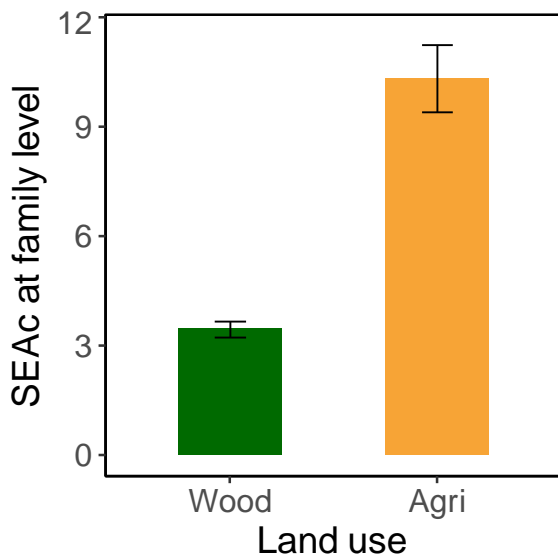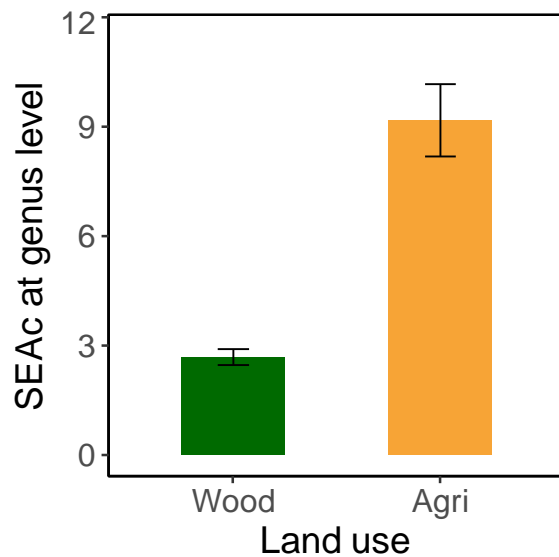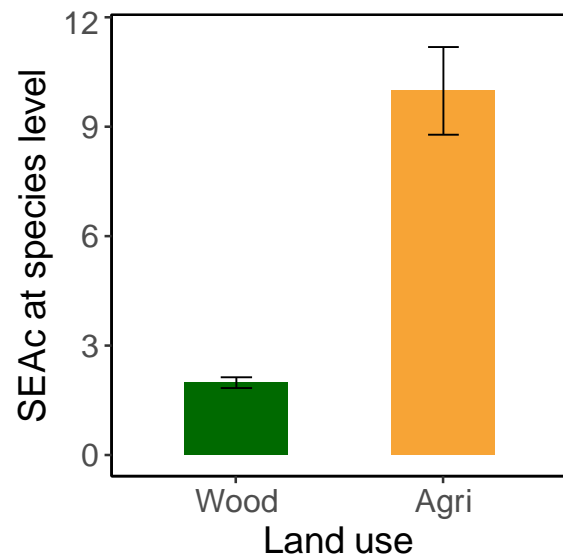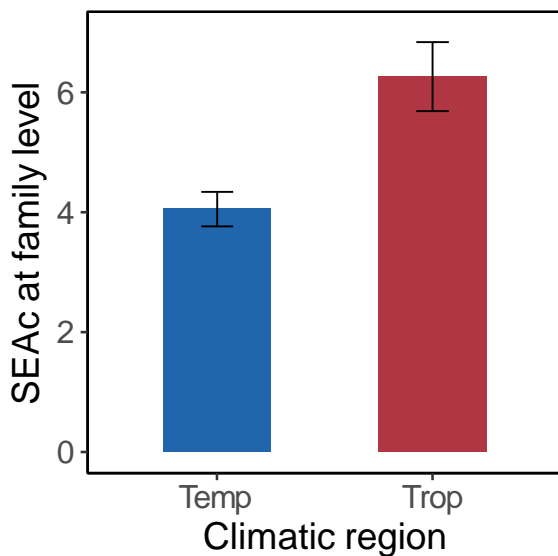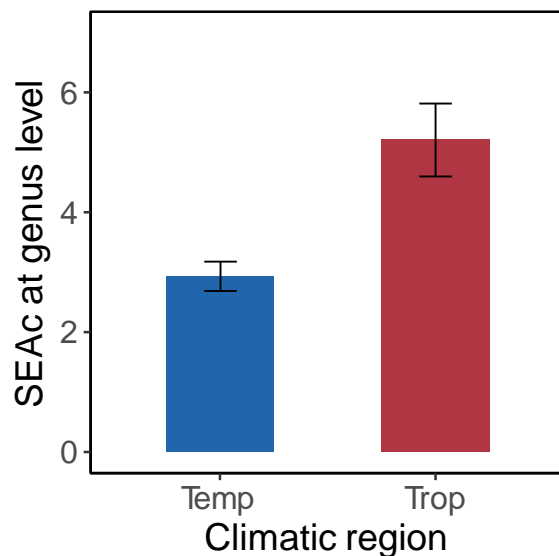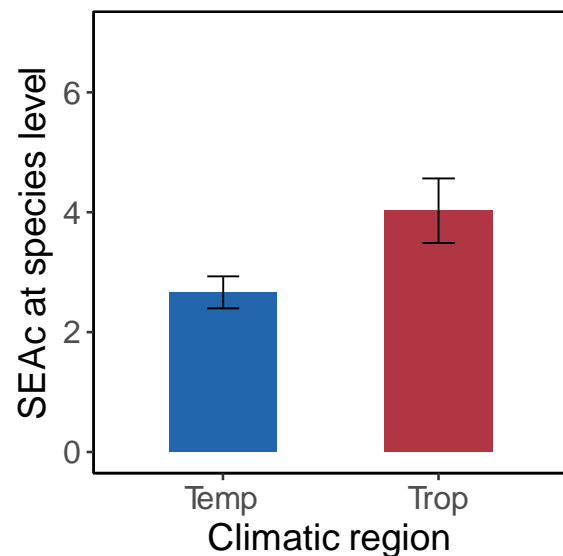

Supplement: Supplementary file 1 [file 9deecd29bdad75df412b4512.pdf]
